# Supplementary material for: Dietary emulsifier glycerol monodecanoate affects the gut microbiota contributing to regulating lipid metabolism, insulin sensitivity and inflammation
Source: Royal Society of Chemistry journal article supplement (doi:10.1039/d2fo01689c), 2022-01-01
Supplement: d2fo01689c1.pdf [file d2fo01689c1.pdf]

# **Dietary emulsifier glycerol monodecanoate affects gut microbiota contributing to regulating lipid metabolism, insulin sensitivity and inflammation**

Junhui Zhang<sup>1,5,6</sup>, Huilin Yu<sup>1,5,6</sup>, Hao Zhong<sup>3</sup>, Qianqian Wang<sup>1,5,6</sup>, Jun Tang<sup>1,4</sup>, Fei Shen<sup>1,5,6</sup>, Haiying Cai<sup>2</sup>, Tao Liu<sup>1,5,6</sup>, Fengqin Feng<sup>1,5,6</sup> and Minjie Zhao<sup>1,5,6\*</sup>

1. College of Biosystems Engineering and Food Science, Zhejiang University, Hangzhou, 310058, China;
2. School of Biological & Chemical Engineering, Zhejiang University of Science & Technology, Hangzhou, 310023, China;
3. College of Food Science and Technology, Zhejiang University of Technology, Hangzhou, 310014, China;
4. School of Life Sciences, Westlake University, Hangzhou, 310005, China;
5. National Engineering Laboratory of Intelligent Food Technology and Equipment, Zhejiang University, Hangzhou, 310058, China;
6. Key Laboratory for Agro-Products Nutritional Evaluation of Ministry of Agriculture, Zhejiang University, Hangzhou, 310058, China.

\* Correspondence:

Professor Minjie Zhao

Zhejiang University, 866 Yuhangtang Road, Hangzhou, 310005, China

E-mail: minjiezhao@zju.edu.cn

## Supplemental Table 1

### Compositions of experimental diets

| <b>Ingredients (g / 100 g diet)</b>       | <b>NCD</b> | <b>GMD150</b> | <b>GMD800</b> | <b>GMD1600</b> |
|-------------------------------------------|------------|---------------|---------------|----------------|
| Casein                                    | 18.96      | 18.96         | 18.96         | 18.96          |
| L-Cystine                                 | 0.28       | 0.28          | 0.28          | 0.28           |
| Corn Starch                               | 29.86      | 29.86         | 29.86         | 29.86          |
| Maltodextrin                              | 3.32       | 3.32          | 3.32          | 3.32           |
| Sucrose                                   | 33.17      | 33.17         | 33.17         | 33.17          |
| Cellulose                                 | 4.74       | 4.74          | 4.74          | 4.74           |
| Soybean Oil                               | 2.37       | 2.37          | 2.37          | 2.37           |
| Lard                                      | 1.90       | 1.89          | 1.82          | 1.74           |
| GMD                                       | 0          | 0.015         | 0.08          | 0.16           |
| Mineral Mix                               | 2.68       | 2.68          | 2.68          | 2.68           |
| Potassium Citrate, 1 H <sub>2</sub> O     | 1.56       | 1.56          | 1.56          | 1.56           |
| Vitamin Mix                               | 0.95       | 0.95          | 0.95          | 0.95           |
| Choline Bitartrate                        | 0.19       | 0.19          | 0.19          | 0.19           |
| <b>Calories supplementation (kcal %)</b>  |            |               |               |                |
| Proteins                                  | 20         | 20            | 20            | 20             |
| Carbohydrates                             | 70         | 70            | 70            | 70             |
| Fats                                      | 10         | 10            | 10            | 10             |
| <b>Total calories (kcal / 100 g diet)</b> | <b>385</b> | <b>385</b>    | <b>385</b>    | <b>385</b>     |

## Supplemental Table 2

### Primer Sequences Used for qRT-PCR Analysis

|                                | Forward Primer (5'-3')   | Reverse Primer (5'-3')  |
|--------------------------------|--------------------------|-------------------------|
| <i>PPAR<math>\alpha</math></i> | GTCCTCAGTGCTTCCAGAGG     | GGTCACCTACGAGTGGCATT    |
| <i>PPAR<math>\gamma</math></i> | GCATTTCTGCTCCACACTATGA   | TCGCACTTTGGTATTCTTGG    |
| <i>SCD1</i>                    | CCGAAGAGGCAGGTGTAGAG     | TTCTTACACGACCACCACCA    |
| <i>CYP7A1</i>                  | TGGGCATCTCAAGCAAACAC     | TCATTGCTTCAGGGCTCCTG    |
| <i>SREBP-1C</i>                | GATCAAAGAGGAGCCAGTGC     | TAGATGGTGGCTGCTGAGTG    |
| <i>HMGCR</i>                   | GGACCAACCTTCTACCTC       | CCATCACAGTGCCACATAC     |
| <i>G6PC</i>                    | TCTGTCCCGGATCTACCTTG     | GTAGAATCCAAGCGCGAAAC    |
| <i>PEPCK</i>                   | TAGGAGCAGCCATGAGAT       | CGAAGTTGTAGCCGAAGA      |
| <i>GCK</i>                     | TCCCTGTAAGGCACGAAGAC     | ACGATGTTGTTCCCTTCTGC    |
| <i>TLR2</i>                    | CACCGGTCAGAAAACA ACTTACC | CAAGATCCAGAAGAGCCAAAGAG |
| <i>TNF<math>\alpha</math></i>  | AGGCACTCCCCAAAAGAT       | CAGTAGACAGAAGAGCGTGGTG  |
| <i>MCP-1</i>                   | GTGCTGACCCCAAGAAGGAA     | GTGCTGAAGACCTTAGGGCA    |
| <i>YWHAZ</i>                   | TTCTTGATCCCCAATGCTTC     | TTCTTGTCATCACCAGCAGC    |

Supplemental Figure 1

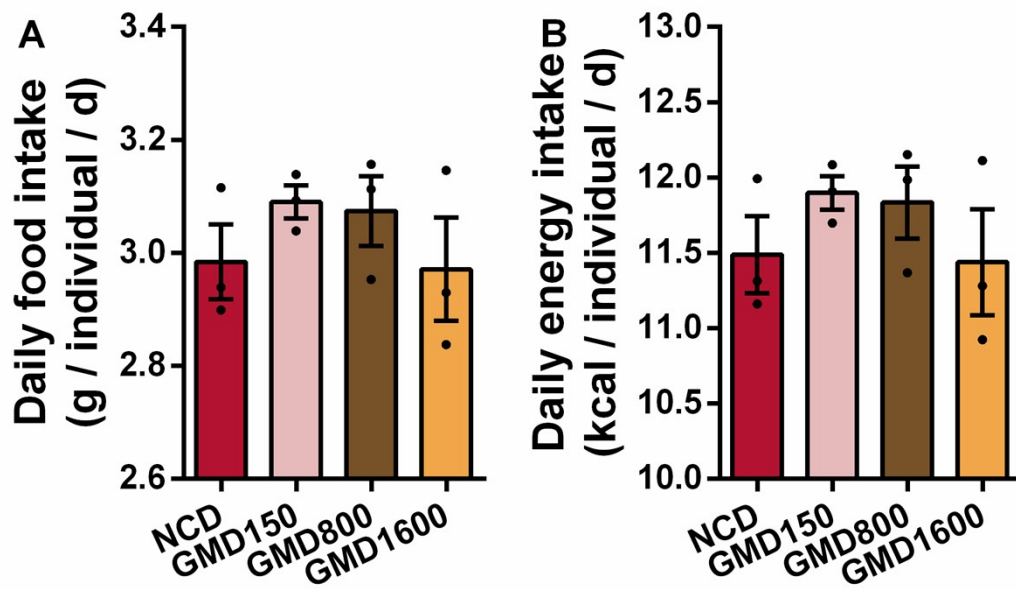

Supplemental Figure 1. A) Daily food intake. B) Daily energy intake. Data are expressed as mean  $\pm$  SEM and compared with one-way analysis of variance (ANOVA) by Tukey's multiple comparison posttests.
